# Supplementary material
Source: PubMed Central journal article supplement (PMC10716718)
Supplement: jama-e2322949-s003.pdf [file jama-e2322949-s003.pdf]

## Supplemental Online Content

Boggess KA, Valint A, Refuerzo JS; et al. Metformin plus insulin for preexisting diabetes or gestational diabetes in early pregnancy: the MOMPOD randomized clinical trial. *JAMA*. doi:10.1001/jama.2023.22949

**eTable 1.** MOMPOD Study Sensitivity Analyses

**eTable 2.** Prespecified Subgroup Analyses by Maternal Baseline Variables

**eTable 3.** Counts of Maternal Serious Adverse Events

**eTable 4.** Fetal/Neonatal Severe Adverse Events

This supplemental material has been provided by the authors to give readers additional information about their work.

**eTable 1. MOMPOD Study Sensitivity Analyses**

|                                                                                                                                    | N   | *BMI Imputed Model                        |         | Complete Case Model                       |         | Unadjusted for Baseline Covariates        |         |
|------------------------------------------------------------------------------------------------------------------------------------|-----|-------------------------------------------|---------|-------------------------------------------|---------|-------------------------------------------|---------|
|                                                                                                                                    |     | Odds Ratio (95% CI) Metformin Vs. Placebo | P-value | Odds Ratio (95% CI) Metformin Vs. Placebo | P-value | Odds Ratio (95% CI) Metformin Vs. Placebo | P-value |
| <b>Sensitivity Analysis 1</b><br><b>Adjusted:</b> Modified intent-to-treat population setting missing primary outcome to event     | 794 | 0.86<br>(0.63, 1.19)                      | 0.36    | 0.88<br>(0.63, 1.23)                      | 0.46    | --                                        | --      |
| <b>Sensitivity Analysis 2,</b><br><b>Unadjusted:</b> Modified intent-to-treat population setting missing primary outcome to event. | 794 | --                                        | --      | --                                        | --      | 0.861<br>(0.631, 1.174)                   | 0.34    |
| <b>Sensitivity Analysis 3:</b> Modified intent-to-treat population removing missing primary outcome                                | 768 | 0.87<br>(0.63, 1.20)                      | 0.57    | 0.89<br>(0.64, 1.24)                      | 0.48    | --                                        | --      |
| <b>Sensitivity Analysis 4:</b> Per protocol population setting missing primary outcome to event                                    | 560 | 0.77<br>(0.52, 1.13)                      | 0.18    | 0.804<br>(0.54, 1.19)                     | 0.28    | --                                        | --      |

BMI refers to the maternal baseline body mass index, which was missing in 32 participants. Adjusted models were created with participants missing BMI data excluded and with missing BMI data imputed. Adjusted models adjusted for study site, timing of diabetes diagnosis (preexisting versus during pregnancy), gestational age at randomization stratified at 18 weeks, and baseline maternal BMI as a continuous variable.

**eTable 2. Prespecified Subgroup Analyses by Maternal Baseline Variables**

|                                                     | Composite Outcome Event n (%) |                    | Adjusted OR (95% CI) |
|-----------------------------------------------------|-------------------------------|--------------------|----------------------|
|                                                     | Metformin<br>(N=397)          | Placebo<br>(N=397) |                      |
| <b>Maternal Baseline BMI<sup>a</sup></b>            |                               |                    |                      |
| ≥ 30 kg/m <sup>2</sup>                              | 219/307 (71.3)                | 202/274 (73.7)     | 0.88 (0.61-1.28)     |
| < 30 kg/m <sup>2</sup>                              | 54/76 (71.1)                  | 78/105 (74.3)      | 0.88 (0.45, 1.74)    |
| Missing                                             | 7/14 (50.0)                   | 12/18 (66.7)       |                      |
| <b>Timing of Diabetes Diagnosis<sup>b</sup></b>     |                               |                    |                      |
| Preexisting                                         | 229/311 (73.6)                | 244/313 (78.0)     | 0.78 (0.54, 1.13)    |
| During Pregnancy                                    | 51/86 (59.3)                  | 48/84 (57.1)       | 1.12 (0.60, 2.06)    |
| <b>Gestational Age at Randomization<sup>c</sup></b> |                               |                    |                      |
| 18 weeks - < 23 weeks                               | 106/162 (65.4)                | 113/165 (68.5)     | 0.89 (0.56-1.43)     |
| 10 weeks - < 18 weeks                               | 174/235 (74.0)                | 179/232 (77.2)     | 0.84 (0.55-1.29)     |

Prespecified subgroups include timing of diabetes diagnosis, maternal BMI at randomization, and gestational age at randomization. All odds ratios are shown for metformin versus placebo. The denominator for percent reported is the overall number of subjects within the subgroup assigned to the treatment. All interaction tests resulted in P > 0.10.

<sup>a</sup>Adjusted for timing of timing of diabetes diagnosis (pregestational versus diagnosed early in pregnancy) and gestational age at randomizations stratified at 18 weeks.

<sup>b</sup>Adjusted by gestational age at randomizations stratified at 18 weeks, and baseline maternal BMI as a continuous variable.

<sup>c</sup>Adjusted by timing of diabetes diagnosis (pregestational versus diagnosed early in pregnancy), and baseline maternal BMI as a continuous variable.

**eTable 3. Counts of Maternal Serious Adverse Events\***

| <b>Maternal</b>                                                     | <b>Metformin/<br/>Insulin<br/>(n=397)</b> | <b>Insulin<br/>Alone<br/>(n=397)</b> | <b>Unadjusted Rate<br/>Difference (%), 95% CI<br/>events per pregnancy,<br/>metformin – insulin<br/>alone</b> |
|---------------------------------------------------------------------|-------------------------------------------|--------------------------------------|---------------------------------------------------------------------------------------------------------------|
| Death                                                               | 2 (1)                                     | 1 (0)                                | 0.25 (-0.60, 1.11)                                                                                            |
| Any serious maternal adverse event                                  | 92                                        | 88                                   | 1.01 (-4.82, 6.83)                                                                                            |
| <sup>a</sup> Cardiac/pulmonary/respiratory<br>mediastinal disorders | 5                                         | 4                                    | 0.25 (-1.22, 1.72)                                                                                            |
| <sup>b</sup> Gastrointestinal/genitourinary                         | 3                                         | 6                                    | - 0.76 (-2.23, 0.72)                                                                                          |
| Hyperglycemia/diabetic ketoacidosis                                 | 12                                        | 8                                    | 1.01 (-1.17, 3.19)                                                                                            |
| Hypertension                                                        | 11                                        | 9                                    | 0.50 (-1.68, 2.68)                                                                                            |
| Hypoglycemia                                                        | 1                                         | 2                                    | -0.25 (-1.11, 0.60)                                                                                           |
| <sup>c</sup> Infections                                             | 9                                         | 17                                   | -2.02 (-4.49, 0.46)                                                                                           |
| Pregnancy complications                                             | 56                                        | 47                                   | 2.27 (-2.40, 6.94)                                                                                            |
| Fetal growth restriction                                            | 1                                         | 1                                    |                                                                                                               |
| #HELLP syndrome                                                     | 0                                         | 2                                    |                                                                                                               |
| Oligohydramnios                                                     | 1                                         | 1                                    |                                                                                                               |
| Placental previa with hemorrhage                                    | 1                                         | 0                                    |                                                                                                               |
| Postpartum hemorrhage                                               | 2                                         | 0                                    |                                                                                                               |
| Preeclampsia/gestational hypertension                               | 48                                        | 36                                   |                                                                                                               |
| Preterm labor                                                       | 1                                         | 4                                    |                                                                                                               |
| Preterm rupture of membranes                                        | 2                                         | 4                                    |                                                                                                               |
| <sup>d</sup> Psychiatric disorders                                  | 2                                         | 1                                    | 0.25 (-0.60, 1.11)                                                                                            |
| Vaginal bleeding                                                    | 0                                         | 2                                    | -0.50 (-1.20, 0.19)                                                                                           |
| <sup>e</sup> Other                                                  | 6                                         | 6                                    | 0.00 ( -1.70, 1.70)                                                                                           |

Data presented as number (%) of randomized participants who took at least one dose of study agent. Some participants had more than one serious adverse event and all events are included in counts.

\*Serious adverse events include those that result in death, are life threatening, require or prolong inpatient hospitalization, result in persistent or significant disability or incapacity, or result in a congenital anomaly.

<sup>a</sup> Consists of stroke, cardiac arrest, heart failure/pulmonary edema, chest pain, dyspnea, asthma

<sup>b</sup> Consists of hyperemesis, abdominal pain, constipation, gastroenteritis, pancreatitis, ovarian cyst, shortened cervix, vaginal discharge

<sup>c</sup> Consists of COVID-19, influenza, pneumonia, endometritis, amnionitis, puerperal infection, osteomyelitis, cystitis, pyelonephritis, gastroenteritis, viral infection, postoperative wound infection, sepsis, abscess

<sup>d</sup> Consists of bipolar disorder, depression, psychosis

<sup>e</sup> Consists of anemia, motor vehicle accident, injury from fall, homelessness, adrenal insufficiency, gastroparesis, cerclage placement, headache, ovarian cyst

**eTable 4. Fetal/Neonatal Severe Adverse Events\***

| <b>Fetal/Neonatal</b>                           | <b>Metformin/Insulin</b> | <b>Insulin Alone</b> | <b>Unadjusted Rate Difference (%), 95% CI events per pregnancy, metformin – insulin alone</b> |
|-------------------------------------------------|--------------------------|----------------------|-----------------------------------------------------------------------------------------------|
| Miscarriage < 20 weeks                          | 7/385 (2)                | 4/380 (1)            | 0.77 (-0.92, 2.45)                                                                            |
| Stillbirth ≥ 20 weeks                           | 3/379 (1)                | 7/377 (2)            | -1.07 (-2.69, 1.56)                                                                           |
| Neonatal death within 28 days of live birth     | 1/379 (1)                | 2/377                | -0.27 (-1.16, 0.63)                                                                           |
| Any serious neonatal adverse event <sup>6</sup> | 63/379                   | 82/377               | -5.13 (-10.73, 0.47)                                                                          |
| Congenital birth defect                         | 13                       | 8                    |                                                                                               |
| <sup>1</sup> Cardiac                            | 9                        | 6                    | 0.78 (-1.20, 2.77)                                                                            |
| <sup>2</sup> Gastrointestinal/genitourinary     | 2                        | 1                    | 0.26 (-0.63, 1.16)                                                                            |
| <sup>3</sup> Other birth defect                 | 2                        | 1                    | 0.53 (-0.51, 1.56)                                                                            |
| <sup>4</sup> Genetic disorder                   | 1                        | 0                    | 0.26 (-0.25, 0.78)                                                                            |
| Metabolic derangement                           | 10                       | 24                   |                                                                                               |
| Hypoglycemia                                    | 8                        | 13                   | -1.34 (-3.68, 1.00)                                                                           |
| Hyperbilirubinemia/jaundice                     | 2                        | 10                   | -2.12 (-3.90, -0.35)                                                                          |
| Hypocalcemia                                    | 0                        | 1                    | -0.27 (-0.78, 0.25)                                                                           |
| Prematurity                                     | 19                       | 22                   | -0.82 (-4.05, 2.41)                                                                           |
| Respiratory distress/failure/immaturity         | 7                        | 12                   | -1.34 (-3.57, 0.89)                                                                           |
| <sup>5</sup> Other complications                | 6                        | 6                    | -0.01 (-1.79, 1.77)                                                                           |

Data presented as number (%) of randomized participants who took at least one dose of study agent and for whom fetal/neonatal data was available. Some participants had more than one serious adverse event and all events are included in counts.

\*Serious adverse events include those that result in death, are life threatening, require or prolong inpatient hospitalization, result in persistent or significant disability or incapacity, or result in a congenital anomaly.

<sup>1</sup> Consists of atrial septal defect, ventricular septal defect, persistent fetal circulation, tetralogy of Fallot, truncus arteriosus

<sup>2</sup> Consists of anal atresia, ambiguous genitalia

<sup>3</sup> Consists of cleft lip, pulmonary malformation, laryngeomalacia

<sup>4</sup> Beckwith Wiedemann syndrome

<sup>5</sup> Consists of necrotizing enterocolitis, interventricular hemorrhage, seizures, testicular torsion, viral infection, hypertension, pulmonary hypertension, hydrops, small for gestational age, preeclampsia, hemolysis
