# Supplementary material
Source: PubMed Central journal article supplement (PMC10716718)
Supplement: jama-e2322949-s004.pdf [file jama-e2322949-s004.pdf]

## **Data Sharing Statement**

### **Data**

**Data available:** No
